# Supplementary material for: Heterogeneity in Response to MCT and Psychoeducation: A Feasibility Study Using Latent Class Mixed Models in First-Episode Psychosis
Source: MDPI journal article supplement (doi:10.3390/healthcare10112155), 2022-10-28
Supplement: s1 [file s1]

**Table S1.** Baseline, post-test and follow up characteristics of each trajectory in the MCT group.

|                                         | Metacognitive Training Group |        |                    |        |             |       |         |                        |        |                     |        |             |       |         |
|-----------------------------------------|------------------------------|--------|--------------------|--------|-------------|-------|---------|------------------------|--------|---------------------|--------|-------------|-------|---------|
|                                         | Self-reflectivity            |        |                    |        |             |       |         | Self-certainty         |        |                     |        |             |       |         |
|                                         | High SR (N=20)               |        | Improving SR (N=8) |        | U/ $\chi^2$ | p     | RBC     | Initial decline (N=22) |        | Responsive SC (N=6) |        | U/ $\chi^2$ | p     | RBC     |
|                                         | Mean/%                       | SD     | Mean/%             | SD     |             |       |         | Mean/%                 | SD     | Mean/%              | SD     |             |       |         |
| <b>Baseline</b>                         |                              |        |                    |        |             |       |         |                        |        |                     |        |             |       |         |
| Age                                     | 25.850                       | 7.916  | 25.500             | 7.838  | 78.50       | 0.959 | 0.01875 | 24.455                 | 6.262  | 30.500              | 11.185 | 46.00       | 0.273 | 0.30303 |
| Number of hospital admissions           | 0.750                        | 0.786  | 2.000              | 1.826  | 38.50       | 0.063 | 0.45000 | 0.952                  | 1.024  | 1.500               | 1.871  | 54.50       | 0.613 | 0.13492 |
| Education                               |                              |        |                    |        | 2.829       | 0.726 |         |                        |        |                     |        | 9.934       | 0.077 |         |
| <i>Incomplete primary education</i>     | 15                           |        | 37.5               |        |             |       |         | 22.7                   |        | 16.7                |        |             |       |         |
| <i>Complete primary education</i>       | 35                           |        | 12.5               |        |             |       |         | 31.8                   |        | 16.7                |        |             |       |         |
| <i>Incomplete secondary education</i>   | 10                           |        | 12.5               |        |             |       |         | 4.5                    |        | 33.3                |        |             |       |         |
| <i>Complete secondary education</i>     | 25                           |        | 25                 |        |             |       |         | 31.8                   |        |                     |        |             |       |         |
| <i>Incomplete superior education</i>    | 5                            |        |                    |        |             |       |         |                        |        | 16.7                |        |             |       |         |
| <i>Complete superior education</i>      | 10                           |        | 12.5               |        |             |       |         | 9.1                    |        | 16.7                |        |             |       |         |
| Diagnosis                               |                              |        |                    |        | 4.035       | 0.544 |         |                        |        |                     |        | 2.077       | 0.838 |         |
| <i>Schizophrenia</i>                    | 40                           |        | 62.5               |        |             |       |         | 45.5                   |        | 50                  |        |             |       |         |
| <i>Non-specified psychotic disorder</i> | 25                           |        | 1                  |        |             |       |         | 18.2                   |        | 33.3                |        |             |       |         |
| <i>Schizoaffective disorder</i>         | 5                            |        |                    |        |             |       |         | 4.5                    |        | 16.7                |        |             |       |         |
| <i>Delusional disorder</i>              | 5                            |        | 1                  |        |             |       |         | 9.1                    |        |                     |        |             |       |         |
| <i>Brief psychotic episode</i>          | 15                           |        |                    |        |             |       |         | 9.1                    |        |                     |        |             |       |         |
| <i>Schizophreniform disorder</i>        | 10                           |        |                    |        |             |       |         | 9.1                    |        |                     |        |             |       |         |
| PANSS                                   |                              |        |                    |        |             |       |         |                        |        |                     |        |             |       |         |
| <i>Positive symptoms</i>                | 12.400                       | 4.512  | 11.875             | 1.553  | 77.50       | 0.919 | 0.03125 | 11.545                 | 3.247  | 14.833              | 5.154  | 38.00       | 0.122 | 0.42424 |
| <i>Negative symptoms</i>                | 12.050                       | 5.898  | 20.750             | 6.453  | 20.00       | 0.002 | 0.75000 | 13.636                 | 6.075  | 17.833              | 10.265 | 55.50       | 0.574 | 0.15909 |
| <i>General symptoms</i>                 | 24.600                       | 6.613  | 34.250             | 6.274  | 22.00       | 0.003 | 0.72500 | 25.955                 | 6.979  | 32.500              | 9.094  | 36.50       | 0.104 | 0.44697 |
| <i>Total</i>                            | 49.050                       | 14.255 | 66.875             | 11.910 | 25.50       | 0.006 | 0.68125 | 51.136                 | 13.361 | 65.167              | 19.964 | 37.00       | 0.110 | 0.43939 |
| GAF                                     | 71.500                       | 10.390 | 54.375             | 12.374 | 23.00       | 0.004 | 0.71250 | 68.409                 | 12.565 | 60.000              | 15.166 | 42.50       | 0.193 | 0.35606 |
| SUMD global score                       | 5.600                        | 2.542  | 6.375              | 3.159  | 68.50       | 0.561 | 0.14375 | 5.818                  | 2.648  | 5.833               | 3.125  | 66.00       | 1.000 | 0.00000 |

|                        |                    |         |        |        |        |       |       |         |         |        |        |        |       |       |         |
|------------------------|--------------------|---------|--------|--------|--------|-------|-------|---------|---------|--------|--------|--------|-------|-------|---------|
| Beads Task             |                    |         |        |        |        |       |       |         |         |        |        |        |       |       |         |
|                        | 85-15              | 3.842   | 4.400  | 3.125  | 2.232  | 75.50 | 1.000 | 0.00658 | 3.857   | 4.269  | 2.833  | 1.835  | 60.00 | 0.881 | 0.04762 |
|                        | 60-40              | 6.842   | 4.180  | 5.500  | 3.586  | 66.00 | 0.611 | 0.13158 | 6.571   | 4.142  | 6.000  | 3.742  | 61.00 | 0.930 | 0.03175 |
|                        | Affective          | 6.053   | 3.937  | 7.125  | 5.890  | 69.00 | 0.728 | 0.09211 | 6.571   | 4.760  | 5.667  | 3.777  | 60.00 | 0.883 | 0.04762 |
| IPSAQ                  |                    |         |        |        |        |       |       |         |         |        |        |        |       |       |         |
|                        | Externalizing bias | 0.450   | 3.546  | -0.714 | 3.251  | 57.50 | 0.504 | 0.17857 | -0.238  | 3.548  | 1.500  | 2.950  | 44.00 | 0.277 | 0.30159 |
|                        | Personalizing bias | 1.351   | 0.693  | 0.987  | 0.809  | 54.00 | 0.391 | 0.22857 | 1.224   | 0.801  | 1.373  | 0.398  | 58.00 | 0.793 | 0.07937 |
| Hinting task           |                    | 4.850   | 0.745  | 4.375  | 1.506  | 68.50 | 0.532 | 0.14375 | 4.682   | 0.995  | 4.833  | 1.169  | 59.50 | 0.708 | 0.09848 |
| Rosenberg self-esteem  |                    | 29.700  | 4.932  | 22.250 | 6.902  | 29.50 | 0.011 | 0.63125 | 26.636  | 6.807  | 31.000 | 3.162  | 38.50 | 0.130 | 0.41667 |
| Faces Test             |                    | 17.700  | 2.003  | 17.625 | 1.408  | 73.50 | 0.757 | 0.08125 | 17.955  | 1.676  | 16.667 | 2.160  | 42.50 | 0.191 | 0.35606 |
| Estimated premorbid IQ |                    | 101.000 | 15.778 | 94.167 | 10.685 | 44.50 | 0.354 | 0.25833 | 100.250 | 15.515 | 96.667 | 13.292 | 50.50 | 0.578 | 0.15833 |
| Post-test              |                    |         |        |        |        |       |       |         |         |        |        |        |       |       |         |
| PANSS                  |                    |         |        |        |        |       |       |         |         |        |        |        |       |       |         |
|                        | Positive symptoms  | 10.842  | 3.594  | 12.000 | 1.414  | 42.00 | 0.352 | 0.26316 | 10.158  | 2.544  | 14.167 | 3.430  | 18.50 | 0.015 | 0.67544 |
|                        | Negative symptoms  | 11.737  | 5.425  | 21.500 | 7.556  | 12.00 | 0.004 | 0.78947 | 13.211  | 6.503  | 16.833 | 9.261  | 46.00 | 0.501 | 0.19298 |
|                        | General symptoms   | 24.263  | 6.244  | 32.667 | 6.346  | 21.50 | 0.026 | 0.62281 | 25.053  | 6.442  | 30.167 | 8.472  | 36.50 | 0.202 | 0.35965 |
|                        | Total              | 46.842  | 13.297 | 66.167 | 11.161 | 13.50 | 0.006 | 0.76316 | 48.421  | 13.285 | 61.167 | 17.837 | 33.00 | 0.134 | 0.42105 |
| GAF                    |                    | 69.895  | 8.627  | 57.500 | 12.942 | 20.50 | 0.021 | 0.64035 | 67.263  | 11.780 | 65.833 | 8.612  | 49.50 | 0.653 | 0.13158 |
| SUMD global score      |                    | 4.667   | 2.301  | 6.667  | 1.966  | 24.00 | 0.040 | 0.55556 | 5.167   | 2.307  | 5.167  | 2.714  | 66.00 | 1.000 | 0.00000 |
| Beads Task             |                    |         |        |        |        |       |       |         |         |        |        |        |       |       |         |
|                        | 85-15              | 5.474   | 5.491  | 4.200  | 1.095  | 42.50 | 0.742 | 0.10526 | 5.611   | 5.564  | 4.000  | 1.789  | 60.00 | 0.881 | 0.04762 |
|                        | 60-40              | 8.684   | 5.154  | 9.000  | 2.646  | 42.50 | 0.747 | 0.10526 | 9.278   | 4.824  | 7.167  | 4.262  | 61.00 | 0.930 | 0.03175 |
|                        | Affective          | 8.158   | 4.610  | 7.200  | 3.114  | 47.00 | 1.000 | 0.01053 | 8.111   | 4.310  | 7.500  | 4.637  | 60.00 | 0.883 | 0.04762 |
| IPSAQ                  |                    |         |        |        |        |       |       |         |         |        |        |        |       |       |         |
|                        | Externalizing bias | 0.158   | 2.410  | 1.400  | 1.817  | 31.50 | 0.265 | 0.33684 | 0.778   | 2.315  | -0.667 | 2.160  | 44.00 | 0.277 | 0.30159 |
|                        | Personalizing bias | 1.254   | 0.460  | 0.958  | 0.529  | 34.00 | 0.354 | 0.28421 | 1.178   | 0.496  | 1.236  | 0.466  | 58.00 | 0.793 | 0.07937 |
| Hinting task           |                    | 5.158   | 1.015  | 4.500  | 2.258  | 50.00 | 0.657 | 0.12281 | 4.895   | 1.449  | 5.333  | 1.211  | 59.50 | 0.708 | 0.09848 |
| Rosenberg self-esteem  |                    | 29.368  | 4.512  | 23.167 | 8.565  | 27.00 | 0.059 | 0.52632 | 26.895  | 6.616  | 31.000 | 2.966  | 38.50 | 0.130 | 0.41667 |
| Faces Test             |                    | 17.211  | 2.070  | 17.667 | 1.506  | 54.50 | 0.897 | 0.04386 | 17.421  | 1.774  | 17.000 | 2.530  | 42.50 | 0.191 | 0.35606 |

| 6 month FU            |                           |        |        |        |        |       |       |         |        |        |        |        |       |       |         |
|-----------------------|---------------------------|--------|--------|--------|--------|-------|-------|---------|--------|--------|--------|--------|-------|-------|---------|
| PANSS                 |                           |        |        |        |        |       |       |         |        |        |        |        |       |       |         |
|                       | <i>Positive symptoms</i>  | 10.333 | 3.694  | 11.333 | 2.422  | 37.00 | 0.263 | 0.31481 | 9.556  | 2.455  | 13.667 | 4.179  | 20.50 | 0.025 | 0.62037 |
|                       | <i>Negative symptoms</i>  | 11.278 | 5.399  | 19.000 | 9.143  | 22.00 | 0.034 | 0.59259 | 12.389 | 6.705  | 15.667 | 8.595  | 43.00 | 0.479 | 0.20370 |
|                       | <i>General symptoms</i>   | 21.722 | 5.027  | 32.400 | 7.987  | 10.00 | 0.010 | 0.77778 | 22.294 | 6.008  | 29.000 | 8.414  | 23.50 | 0.058 | 0.53922 |
|                       | <i>Total</i>              | 43.333 | 12.705 | 65.000 | 17.507 | 12.50 | 0.017 | 0.72222 | 44.412 | 14.444 | 58.333 | 17.941 | 24.50 | 0.068 | 0.51961 |
| GAF                   |                           | 73.444 | 9.482  | 65.167 | 16.678 | 33.50 | 0.178 | 0.37963 | 71.278 | 12.352 | 71.667 | 11.255 | 52.50 | 0.946 | 0.02778 |
| SUMD global score     |                           | 4.444  | 1.756  | 7.500  | 3.017  | 20.00 | 0.020 | 0.62963 | 5.167  | 2.595  | 5.333  | 2.251  | 49.00 | 0.756 | 0.09259 |
| Beads Task            |                           |        |        |        |        |       |       |         |        |        |        |        |       |       |         |
|                       | <i>85-15</i>              | 4.778  | 1.768  | 3.167  | 2.041  | 30.50 | 0.119 | 0.43519 | 4.222  | 2.130  | 4.833  | 1.169  | 40.50 | 0.378 | 0.25000 |
|                       | <i>60-40</i>              | 8.222  | 5.242  | 6.667  | 4.082  | 43.50 | 0.503 | 0.19444 | 7.167  | 4.541  | 9.833  | 5.981  | 39.00 | 0.331 | 0.27778 |
|                       | <i>Affective</i>          | 7.667  | 3.646  | 6.833  | 3.488  | 49.00 | 0.761 | 0.09259 | 7.444  | 3.944  | 7.500  | 2.258  | 50.50 | 0.839 | 0.06481 |
| IPSAQ                 |                           |        |        |        |        |       |       |         |        |        |        |        |       |       |         |
|                       | <i>Externalizing bias</i> | 1.944  | 3.404  | 0.800  | 3.114  | 37.50 | 0.598 | 0.16667 | 1.941  | 3.526  | 1.000  | 2.757  | 42.50 | 0.572 | 0.16667 |
|                       | <i>Personalizing bias</i> | 1.275  | 0.317  | 1.097  | 0.403  | 7.00  | 0.357 | 0.41667 | 1.369  | 0.215  | 0.978  | 0.379  | 6.00  | 0.155 | 0.57143 |
| Hinting task          |                           | 5.111  | 1.023  | 4.667  | 1.366  | 42.00 | 0.413 | 0.22222 | 5.000  | 1.085  | 5.000  | 1.265  | 51.50 | 0.887 | 0.04630 |
| Rosenberg self-esteem |                           | 31.333 | 3.926  | 25.833 | 8.565  | 31.50 | 0.141 | 0.41667 | 29.722 | 6.304  | 30.667 | 4.131  | 53.00 | 0.973 | 0.01852 |
| Faces Test            |                           | 17.611 | 1.787  | 18.333 | 1.211  | 41.50 | 0.409 | 0.23148 | 17.889 | 1.023  | 17.500 | 3.017  | 50.00 | 0.810 | 0.07407 |

**Table S2.** Baseline, post-test, and follow-up characteristics of each trajectory in the psychoeducation group.

|                                         | Psychoeducation   |        |                     |        |             |       |         |                          |        |                     |       |             |       |         |
|-----------------------------------------|-------------------|--------|---------------------|--------|-------------|-------|---------|--------------------------|--------|---------------------|-------|-------------|-------|---------|
|                                         | Self-reflectivity |        |                     |        |             |       |         | Self-certainty           |        |                     |       |             |       |         |
|                                         | Low SR (N=17)     |        | Worsening SR (N=16) |        | U/ $\chi^2$ | p     | RBC     | Low and stable SC (N=23) |        | Worsening SC (N=11) |       | U/ $\chi^2$ | p     | RBC     |
|                                         | Mean/%            | SD     | Mean/%              | SD     |             |       |         | Mean/%                   | SD     | Mean/%              | SD    |             |       |         |
| <b>Baseline</b>                         |                   |        |                     |        |             |       |         |                          |        |                     |       |             |       |         |
| Age                                     | 29.235            | 6.300  | 28.188              | 7.884  | 123.00      | 0.652 | 0.09559 | 29.304                   | 6.131  | 27.818              | 8.623 | 110.50      | 0.568 | 0.12648 |
| Number of hospital admissions           | 1.882             | 1.409  | 1.313               | 1.138  | 107.50      | 0.299 | 0.20956 | 1.478                    | 1.310  | 1.818               | 1.250 | 106.00      | 0.447 | 0.16206 |
| Education                               |                   |        |                     |        | 2.102       | 0.835 |         |                          |        |                     |       | 11.98       | 0.035 |         |
| <i>Incomplete primary education</i>     | 11.8              |        | 12.5                |        |             |       |         | 8.7                      |        | 18.2                |       |             |       |         |
| <i>Complete primary education</i>       | 11.8              |        | 18.8                |        |             |       |         | 13                       |        | 27.3                |       |             |       |         |
| <i>Incomplete secondary education</i>   | 29.4              |        | 12.5                |        |             |       |         | 8.7                      |        | 45.5                |       |             |       |         |
| <i>Complete secondary education</i>     | 23.5              |        | 31.3                |        |             |       |         | 34.8                     |        | 9.1                 |       |             |       |         |
| <i>Incomplete superior education</i>    | 11.8              |        | 18.8                |        |             |       |         | 21.7                     |        |                     |       |             |       |         |
| <i>Complete superior education</i>      | 11.8              |        | 6.3                 |        |             |       |         | 13                       |        |                     |       |             |       |         |
| Diagnosis                               |                   |        |                     |        | 9.86        | 0.04  |         |                          |        |                     |       | 3.9         | 0.42  |         |
| <i>Schizophrenia</i>                    | 76.5              |        | 31.3                |        |             |       |         | 52.2                     |        | 63.3                |       |             |       |         |
| <i>Non-specified psychotic disorder</i> |                   |        | 25                  |        |             |       |         | 13                       |        | 9.1                 |       |             |       |         |
| <i>Schizoaffective disorder</i>         | 5.9               |        | 18.8                |        |             |       |         | 13                       |        | 9.1                 |       |             |       |         |
| <i>Delusional disorder</i>              |                   |        |                     |        |             |       |         |                          |        |                     |       |             |       |         |
| <i>Brief psychotic episode</i>          | 5.9               |        | 18.8                |        |             |       |         | 17.4                     |        |                     |       |             |       |         |
| <i>Schizophreniform disorder</i>        | 11.8              |        | 6.3                 |        |             |       |         | 4.3                      |        | 18.2                |       |             |       |         |
| PANSS                                   |                   |        |                     |        |             |       |         |                          |        |                     |       |             |       |         |
| <i>Positive symptoms</i>                | 13.529            | 4.571  | 11.813              | 4.277  | 106.00      | 0.285 | 0.22059 | 11.478                   | 4.491  | 14.727              | 3.771 | 70.50       | 0.040 | 0.44269 |
| <i>Negative symptoms</i>                | 16.235            | 4.790  | 13.750              | 4.655  | 97.00       | 0.164 | 0.28676 | 14.478                   | 4.571  | 16.545              | 5.165 | 100.50      | 0.346 | 0.20553 |
| <i>General symptoms</i>                 | 28.000            | 5.500  | 26.563              | 6.603  | 113.00      | 0.416 | 0.16912 | 26.304                   | 6.018  | 29.273              | 5.424 | 93.00       | 0.223 | 0.26482 |
| <i>Total</i>                            | 57.765            | 11.306 | 52.125              | 12.971 | 97.00       | 0.165 | 0.28676 | 52.261                   | 12.531 | 60.545              | 9.353 | 78.50       | 0.080 | 0.37945 |
| GAF                                     | 55.588            | 11.974 | 59.375              | 11.955 | 125.00      | 0.702 | 0.08088 | 59.565                   | 12.605 | 53.182              | 8.739 | 78.00       | 0.074 | 0.38340 |
| SUMD global score                       | 6.706             | 3.567  | 5.500               | 3.759  | 107.50      | 0.283 | 0.20956 | 4.391                    | 2.589  | 9.455               | 3.142 | 31.50       | <.001 | 0.75099 |

|                        |                           |        |        |        |        |        |       |         |        |        |        |        |        |       |         |
|------------------------|---------------------------|--------|--------|--------|--------|--------|-------|---------|--------|--------|--------|--------|--------|-------|---------|
| Beads Task             |                           |        |        |        |        |        |       |         |        |        |        |        |        |       |         |
|                        | <i>85-15</i>              | 6.294  | 5.312  | 4.500  | 2.828  | 117.50 | 0.511 | 0.13603 | 5.696  | 4.072  | 4.636  | 4.802  | 88.00  | 0.155 | 0.30435 |
|                        | <i>60-40</i>              | 9.647  | 5.338  | 7.375  | 5.045  | 106.00 | 0.286 | 0.22059 | 9.913  | 5.080  | 5.636  | 4.202  | 57.50  | 0.011 | 0.54545 |
|                        | <i>Affective</i>          | 8.706  | 4.858  | 6.750  | 3.152  | 116.50 | 0.490 | 0.14338 | 8.391  | 3.615  | 6.545  | 4.967  | 82.50  | 0.106 | 0.34783 |
| IPSAQ                  |                           |        |        |        |        |        |       |         |        |        |        |        |        |       |         |
|                        | <i>Externalizing bias</i> | 1.176  | 4.290  | 2.000  | 3.559  | 111.00 | 0.374 | 0.18382 | 2.087  | 4.078  | 0.455  | 3.236  | 111.50 | 0.591 | 0.11858 |
|                        | <i>Personalizing bias</i> | 1.365  | 0.533  | 1.084  | 0.460  | 100.00 | 0.201 | 0.26471 | 1.219  | 0.556  | 1.218  | 0.411  | 125.50 | 0.985 | 0.00791 |
| Hinting task           |                           | 4.647  | 1.057  | 4.688  | 0.946  | 132.50 | 0.906 | 0.02574 | 4.783  | 0.951  | 4.455  | 1.036  | 106.50 | 0.427 | 0.15810 |
| Rosenberg self-esteem  |                           | 28.000 | 4.690  | 17.647 | 1.455  | 125.50 | 0.718 | 0.07721 | 27.391 | 4.283  | 27.364 | 6.592  | 125.50 | 0.985 | 0.00791 |
| Faces Test             |                           | 17.647 | 1.455  | 17.188 | 1.328  | 118.50 | 0.529 | 0.12868 | 17.870 | 1.254  | 16.636 | 1.362  | 64.00  | 0.019 | 0.49407 |
| Estimated premorbid IQ |                           | 96.563 | 10.912 | 97.667 | 16.676 | 112.50 | 0.779 | 0.06250 | 98.409 | 14.090 | 93.000 | 12.737 | 86.00  | 0.333 | 0.21818 |
| Post-test              |                           |        |        |        |        |        |       |         |        |        |        |        |        |       |         |
| PANSS                  |                           |        |        |        |        |        |       |         |        |        |        |        |        |       |         |
|                        | <i>Positive symptoms</i>  | 11.462 | 3.230  | 9.667  | 3.172  | 49.00  | 0.118 | 0.37179 | 9.556  | 2.640  | 13.000 | 3.207  | 27.50  | 0.014 | 0.61806 |
|                        | <i>Negative symptoms</i>  | 14.769 | 4.304  | 13.385 | 4.664  | 67.00  | 0.381 | 0.20710 | 13.000 | 4.346  | 16.750 | 3.327  | 34.50  | 0.029 | 0.54605 |
|                        | <i>General symptoms</i>   | 24.385 | 4.735  | 24.385 | 3.686  | 81.50  | 0.898 | 0.03550 | 23.737 | 3.813  | 26.375 | 4.534  | 50.50  | 0.182 | 0.33553 |
|                        | <i>Total</i>              | 50.615 | 10.540 | 46.583 | 7.821  | 62.00  | 0.398 | 0.20513 | 45.667 | 8.196  | 56.125 | 7.434  | 24.00  | 0.008 | 0.66667 |
| GAF                    |                           | 61.846 | 10.900 | 62.846 | 11.149 | 80.00  | 0.836 | 0.05325 | 64.789 | 10.753 | 56.250 | 7.906  | 37.50  | 0.042 | 0.50658 |
| SUMD global score      |                           | 5.308  | 3.521  | 4.077  | 2.660  | 65.50  | 0.224 | 0.22485 | 3.421  | 1.427  | 7.500  | 4.071  | 33.00  | 0.003 | 0.56579 |
| Beads Task             |                           |        |        |        |        |        |       |         |        |        |        |        |        |       |         |
|                        | <i>85-15</i>              | 4.000  | 2.677  | 5.846  | 5.336  | 73.00  | 0.563 | 0.13609 | 5.789  | 4.590  | 2.625  | 1.598  | 34.00  | 0.023 | 0.55263 |
|                        | <i>60-40</i>              | 8.462  | 4.502  | 8.385  | 2.873  | 81.50  | 0.897 | 0.03550 | 9.737  | 3.034  | 5.625  | 3.543  | 32.50  | 0.021 | 0.57237 |
|                        | <i>Affective</i>          | 7.923  | 4.734  | 7.385  | 2.468  | 84.00  | 1.000 | 0.00592 | 8.684  | 3.146  | 5.375  | 3.889  | 38.50  | 0.043 | 0.49342 |
| IPSAQ                  |                           |        |        |        |        |        |       |         |        |        |        |        |        |       |         |
|                        | <i>Externalizing bias</i> | 0.231  | 3.609  | 1.692  | 5.154  | 73.00  | 0.571 | 0.13609 | 0.895  | 4.748  | 1.750  | 3.845  | 63.50  | 0.522 | 0.16447 |
|                        | <i>Personalizing bias</i> | 1.375  | 0.459  | 1.092  | 0.468  | 47.00  | 0.057 | 0.44379 | 1.232  | 0.567  | 1.137  | 0.255  | 65.50  | 0.595 | 0.13816 |
| Hinting task           |                           | 5.077  | 1.256  | 4.538  | 1.613  | 70.00  | 0.447 | 0.17160 | 5.053  | 1.471  | 4.375  | 1.302  | 45.00  | 0.085 | 0.40789 |
| Rosenberg self-esteem  |                           | 29.231 | 3.516  | 30.462 | 5.125  | 75.50  | 0.661 | 0.10651 | 29.737 | 4.629  | 29.250 | 4.334  | 74.50  | 0.957 | 0.01974 |
| Faces Test             |                           | 17.462 | 1.450  | 18.154 | 1.214  | 61.50  | 0.233 | 0.27219 | 18.000 | 1.291  | 17.500 | 1.512  | 62.00  | 0.457 | 0.18421 |

| 6 month FU            |                           |        |        |        |        |       |       |         |        |        |        |        |       |       |         |
|-----------------------|---------------------------|--------|--------|--------|--------|-------|-------|---------|--------|--------|--------|--------|-------|-------|---------|
| PANSS                 |                           |        |        |        |        |       |       |         |        |        |        |        |       |       |         |
|                       | <i>Positive symptoms</i>  | 11.385 | 3.686  | 9.750  | 3.415  | 51.00 | 0.144 | 0.34615 | 9.556  | 3.072  | 13.375 | 3.335  | 25.00 | 0.009 | 0.65278 |
|                       | <i>Negative symptoms</i>  | 13.923 | 4.804  | 12.167 | 4.152  | 57.50 | 0.274 | 0.26282 | 11.667 | 3.614  | 16.125 | 4.704  | 30.00 | 0.020 | 0.58333 |
|                       | <i>General symptoms</i>   | 24.154 | 4.079  | 22.917 | 3.204  | 58.00 | 0.286 | 0.25641 | 22.647 | 3.622  | 25.500 | 3.117  | 38.50 | 0.089 | 0.43382 |
|                       | <i>Total</i>              | 49.462 | 10.170 | 44.833 | 7.918  | 55.50 | 0.231 | 0.28846 | 43.588 | 8.389  | 55.000 | 5.732  | 19.50 | 0.005 | 0.71324 |
| GAF                   |                           | 63.846 | 12.825 | 65.000 | 12.060 | 73.00 | 0.805 | 0.06410 | 66.667 | 12.166 | 58.750 | 10.264 | 44.00 | 0.124 | 0.38889 |
| SUMD global score     |                           | 5.385  | 3.618  | 4.250  | 2.989  | 67.50 | 0.511 | 0.13462 | 3.500  | 1.689  | 7.625  | 4.207  | 30.50 | 0.005 | 0.57639 |
| Beads Task            |                           |        |        |        |        |       |       |         |        |        |        |        |       |       |         |
|                       | <i>85-15</i>              | 4.769  | 4.003  | 4.750  | 3.864  | 68.50 | 0.619 | 0.12179 | 4.778  | 3.318  | 4.625  | 4.926  | 50.50 | 0.236 | 0.29861 |
|                       | <i>60-40</i>              | 7.692  | 4.461  | 8.083  | 3.175  | 63.00 | 0.426 | 0.19231 | 8.500  | 2.854  | 6.625  | 5.263  | 47.50 | 0.179 | 0.34028 |
|                       | <i>Affective</i>          | 7.692  | 4.956  | 7.833  | 2.980  | 68.50 | 0.622 | 0.12179 | 8.278  | 2.718  | 6.750  | 6.042  | 44.50 | 0.131 | 0.38194 |
| IPSAQ                 |                           |        |        |        |        |       |       |         |        |        |        |        |       |       |         |
|                       | <i>Externalizing bias</i> | 1.231  | 3.539  | 2.250  | 3.957  | 68.00 | 0.604 | 0.12821 | 2.722  | 3.528  | 0.000  | 3.665  | 43.00 | 0.112 | 0.40278 |
|                       | <i>Personalizing bias</i> | 1.663  | 1.660  | 0.956  | 0.767  | 10.00 | 0.429 | 0.33333 | 1.007  | 0.545  | 2.845  | 3.048  | 8.00  | 0.747 | 0.20000 |
| Hinting task          |                           | 5.000  | 0.913  | 4.583  | 0.996  | 59.00 | 0.287 | 0.24359 | 5.056  | 0.802  | 4.250  | 1.035  | 38.50 | 0.051 | 0.46528 |
| Rosenberg self-esteem |                           | 28.615 | 5.853  | 29.167 | 5.424  | 71.50 | 0.743 | 0.08333 | 29.667 | 5.541  | 26.125 | 5.410  | 49.00 | 0.210 | 0.31944 |
| Faces Test            |                           | 17.846 | 1.725  | 17.750 | 1.288  | 74.50 | 0.868 | 0.04487 | 18.000 | 1.328  | 17.500 | 1.852  | 59.00 | 0.479 | 0.18056 |
